# Supplementary material for: Use of a protic salt for the formation of liquid-crystalline proton-conductive complexes with mesomorphic diols
Source: Royal Society of Chemistry journal article supplement (doi:10.1039/c5ta06414g), 2015-01-01
Supplement: c5ta06414g1.pdf [file c5ta06414g1.pdf]

## Supplementary information

### Use of a protic salt for the formation of liquid-crystalline proton-conductive complexes with mesomorphic diols

Akihiro Yamashita<sup>a</sup>, Masafumi Yoshio,<sup>\*a</sup> Bartolome Soberats,<sup>ab</sup> Hiroyuki Ohno<sup>c</sup> and Takashi Kato<sup>\*ab</sup>

<sup>a</sup>Department of Chemistry and Biotechnology, School of Engineering, The University of Tokyo, Hongo, Bunkyo-ku, Tokyo 113-8656, Japan.

<sup>b</sup>CREST, JST, 4-1-8, Honcho, Kawaguchi, Saitama 332-0012, Japan.

<sup>c</sup>Department of Biotechnology, Tokyo University of Agriculture and Technology, Nakacho, Koganei, Tokyo 184-8588, Japan.

\*Corresponding author. E-mail: kato@chiral.t.u-tokyo.ac.jp, yoshio@chembio.t.u-tokyo.ac.jp

#### Table of contents:

- 1. <sup>1</sup>H NMR spectra of protic salt 3**
- 2. XRD diffraction study of compound 1**
- 3 The intercolumnar distance (*a*) and average number of molecules per cross-sectional slice of the columns (*n*)**
- 4. <sup>1</sup>H NMR spectra of 1,3, and the mixture 1/3(50)**
- 5. <sup>13</sup>C NMR spectra of 1, 2, 3, 1/3(50), and 2/3(50)**
- 6. IR spectra of single compounds 1-3 and the mixtures**
- 7. POM images of the uniaxially oriented 2/3(20) in the Col<sub>h</sub> phase**
- 8. Vogel-Tamman-Fulcher plots of the ionic conductivities for mixtures 1/3(x) and 2/3(x)**
- 9. DSC thermograms of 1, 2 and their mixtures with 3**
- 10. Wide-angle XRD diffraction patterns of the mixtures**

## 1. $^1\text{H}$ NMR spectra of protic salt **3**

Protic salt **3** was identified by  $^1\text{H}$  NMR spectroscopy of the  $\text{CDCl}_3$  (Fig. S3) and  $\text{DMSO-d}_6$  solution (Fig. S4). The imidazole NH proton and sulfonic acid proton are not observed for the  $\text{CDCl}_3$  solution (Fig. S3). In contrast, the  $\text{DMSO-d}_6$  solution indicates a broad signal at 14.3 ppm, which is attributable to the imidazolium NH proton.

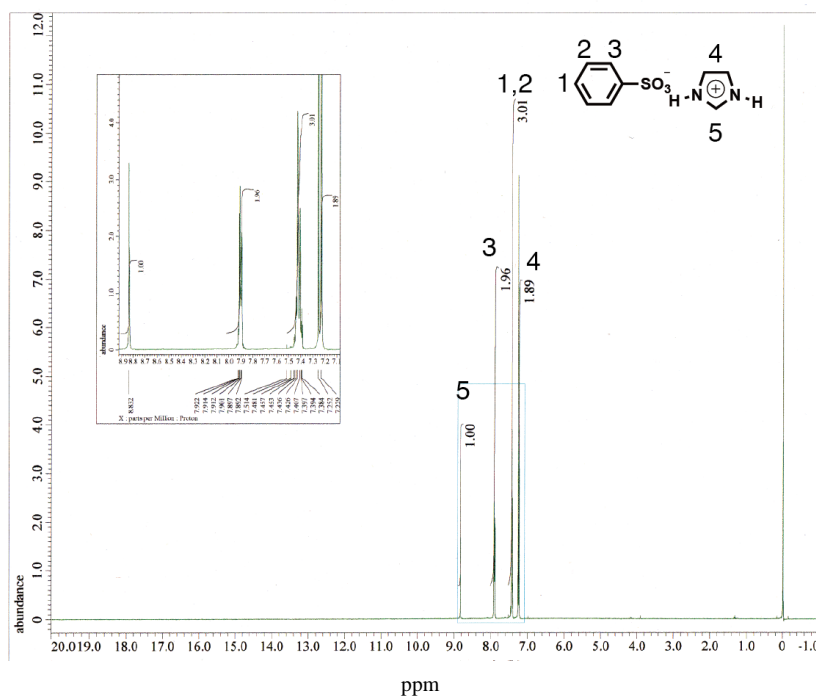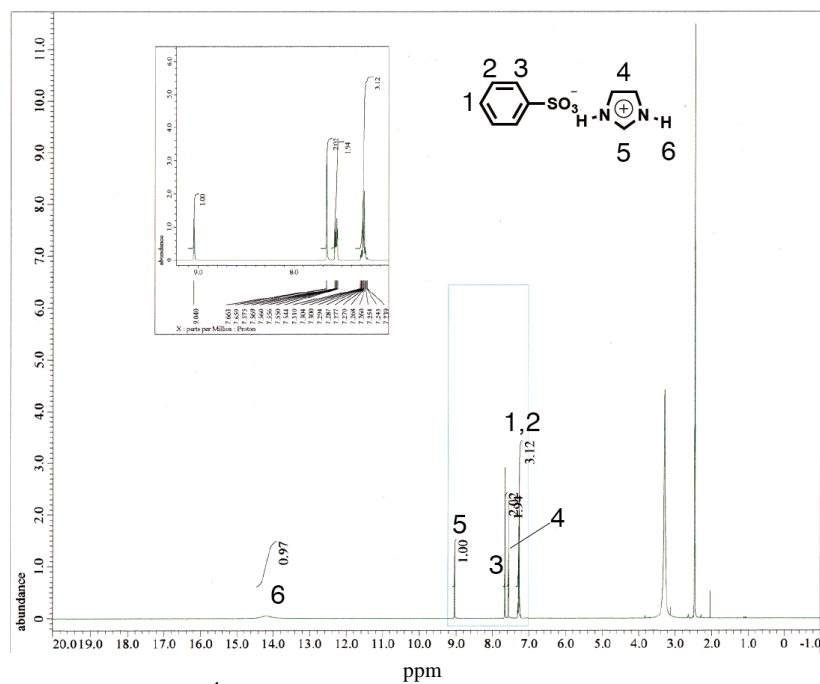

## 2. XRD diffraction study of compound 1

The self-assembled structure of compound **1** was determined by XRD measurements. The wide-angle XRD pattern of **1** at 70 °C shows four peaks corresponding to the diffraction from the (100), (110), (200) and (300) planes of the hexagonal columnar structure. The two-dimensional transmission image of small-angle XRD pattern of **1** aligned homeotropically on a polyimide film at 70 °C shows diffraction spots with a six fold symmetry from the (100) plane.

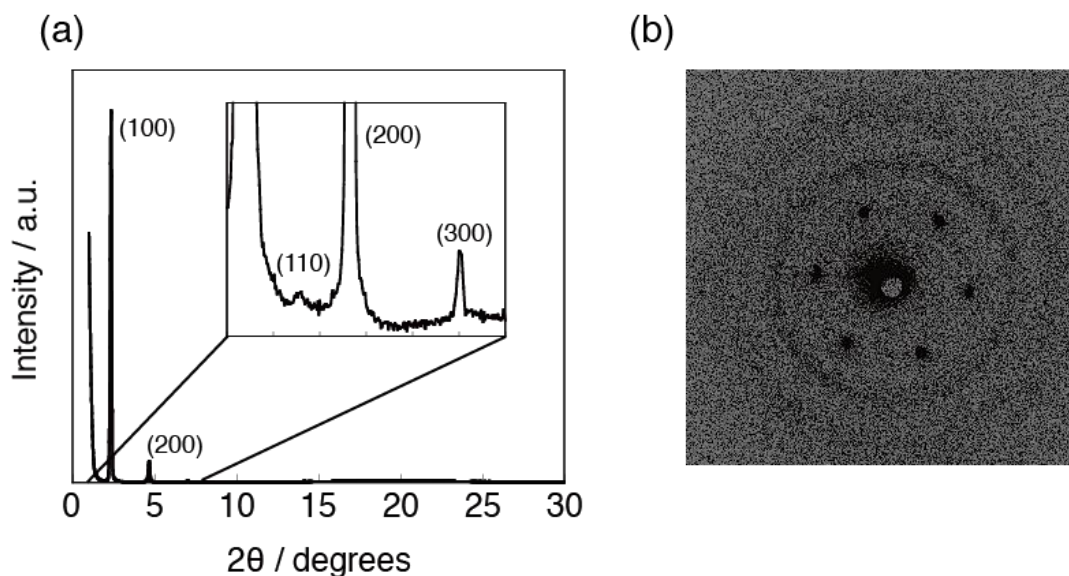

Figure S3. (a) Wide-angle and (b) small-angle XRD patterns of compound **1** in the columnar phase at 70 °C.

## 3. The intercolumnar distance ( $a$ ) and average number of molecules per cross-sectional slice of the columns ( $n$ )

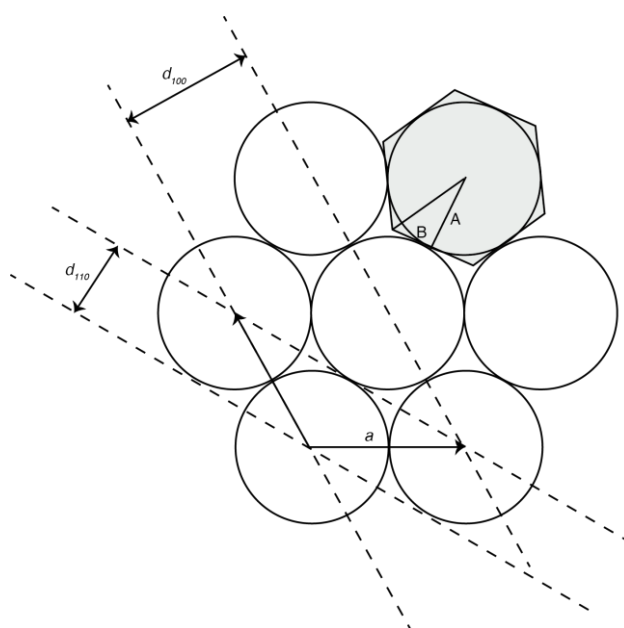

Figure S4. Schematic illustration of the hexagonal columnar lattice.

The intercolumnar distance ( $a$ ) of the single diol compound and the mixtures containing protic salt **3** is estimated as follows. The value of  $d_{100}$  is obtained from the wide-angle XRD patterns.

$$a = \frac{2 \times d_{100}}{\sqrt{3}}$$

The volume of the cross-sectional slice of the column ( $V$ ) is described as follows,

$$V = A \times B \times \frac{1}{2} \times 12 \times h = \frac{\sqrt{3}}{2} a^2 h$$

where  $h$  is the average spacing between benzene rings or molten alkyl chains in the direction of the column axis. The  $h$  value is estimated to be 4.5-4.6 Å from the halo around 20 ° in the wide-angle XRD patterns.

The density ( $\rho$ ) of the material is described as follows:

$$\rho = \frac{\frac{n_1}{N_A} M_1 + \frac{n_3}{N_A} M_3}{V} = \frac{\frac{n_1}{N_A} M_1 + \frac{n_3}{N_A} M_3}{\frac{\sqrt{3}}{2} a^2 h} = \frac{2}{\sqrt{3}} \frac{n_1 M_1 + n_3 M_3}{N_A a^2 h}$$

where  $n_1$  and  $n_3$  are the average number of molecules of compound **1** and protic salt **3** per cross-sectional slice of the columns respectively,  $M_1$  and  $M_3$  are the molecular weight of **1** and **3** ( $M_1 = 564.9$  and  $M_3 = 226.3$ ).  $N_A$  is Avogadro's number ( $6.02 \times 10^{23} \text{ mol}^{-1}$ ).

Therefore,  $n_1$  and  $n_3$  can be obtained by solving the following simultaneous equations.

$$\begin{cases} n_1 : n_3 = (100 - x) : x \\ n_1 M_1 + n_3 M_3 = \frac{\sqrt{3}}{2} N_A a^2 h \rho \end{cases}$$

where  $x$  is the mole% of **3** in the mixtures. The density of the diol compounds and the mixtures containing **3** is assumed to be 1.0 g cm<sup>-3</sup>.

The intercolumnar distance ( $a$ ) of the mixtures **1/3**( $x$ ) and **2/3**( $x$ ) up to  $x = 40$  are shown in Figure S5. The average number of diol molecules **1** ( $n_1$ ) and **2** ( $n_2$ ) and protic salt ( $n_3$ ) in the mixtures per cross-sectional slice of the columns are shown in Figure S6 and S7.

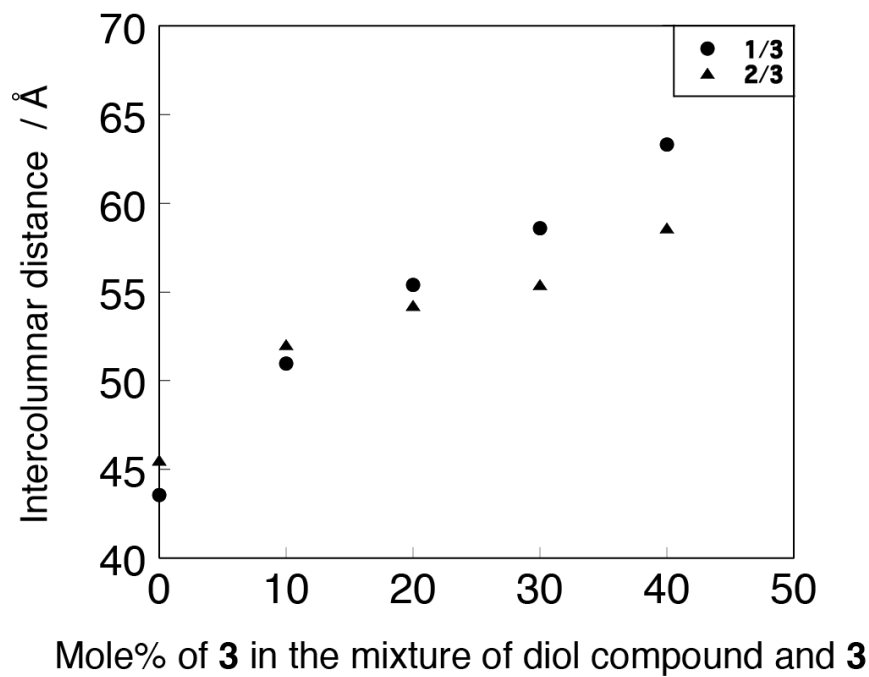

Figure S5. Intercolumnar distance of the mixtures in the  $\text{Col}_h$  phase.

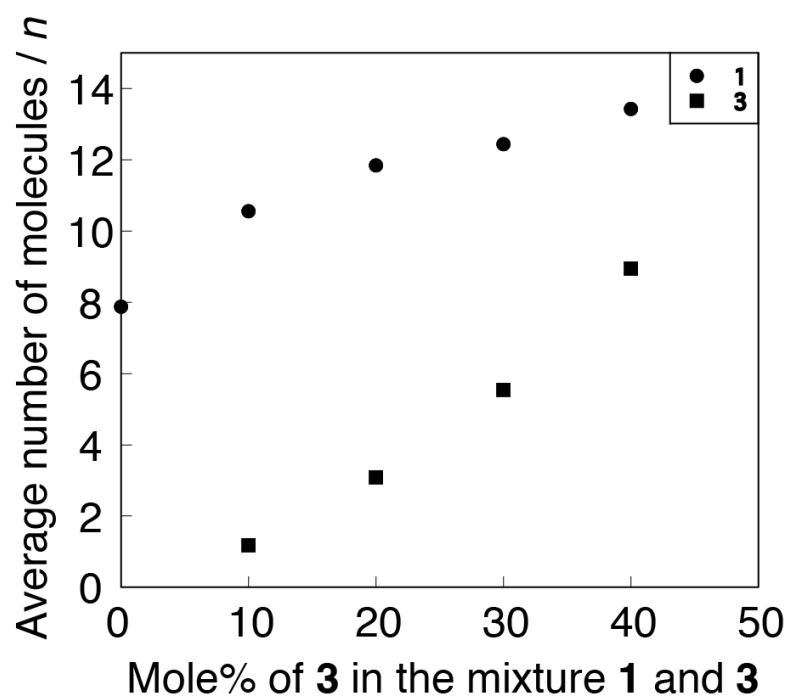

Figure S6. Average number of diol compound **1** ( $n_1$ : ●) and protic salt **3** ( $n_3$ : ■) per cross-sectional slice of the columns.

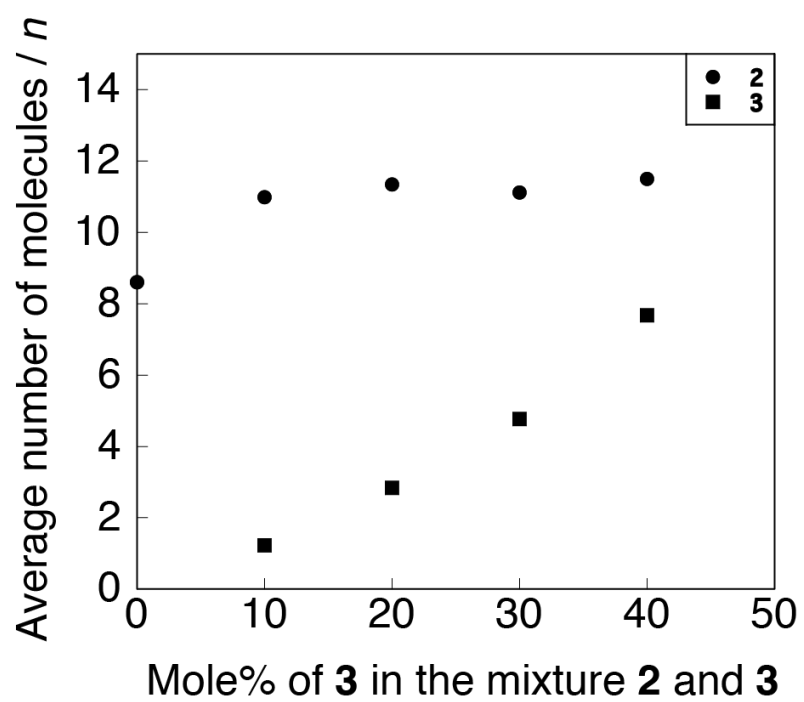

Figure S7. Average number of diol compound **2** ( $n_2$ : ●) and protic salt **3** ( $n_3$ : ■) per cross-sectional slice of the columns.

#### 4. $^1\text{H}$ NMR spectra of **1**, **3**, and the mixture **1/3(50)**

The interactions of diol compound **1** and protic salt **3** were examined by  $^1\text{H}$  NMR. The downfield shift of C(2) proton (H13) of imidazolium cation of **3** was observed.

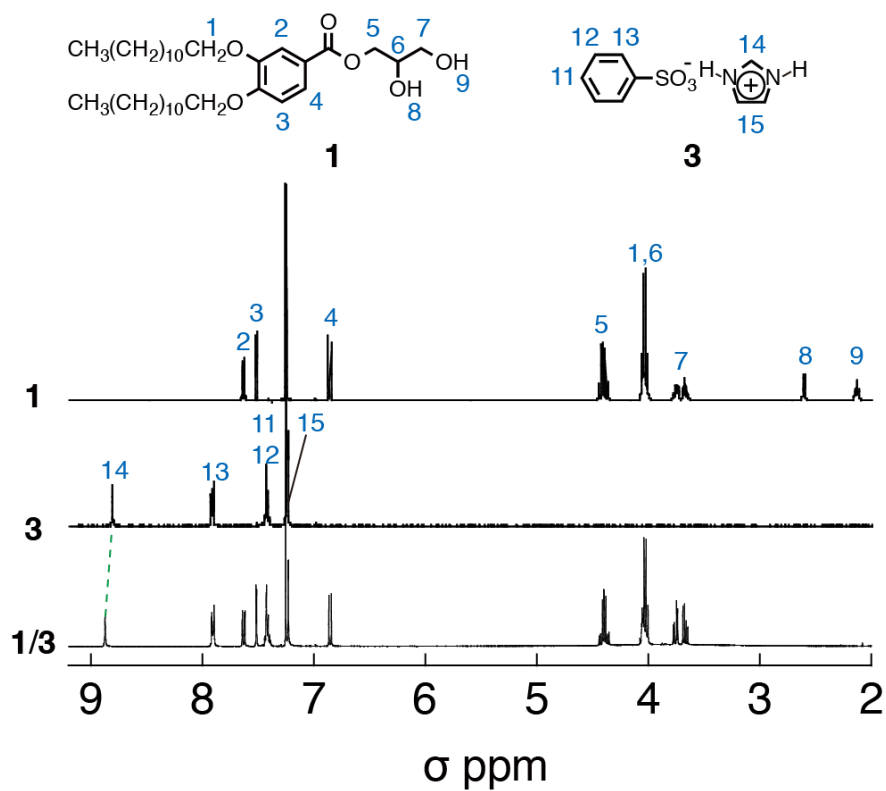

Figure S8.  $^1\text{H}$  NMR spectra of diol **1**, protic salt **3**, and the equimolar mixture of **1** and **3**.

## 5. $^{13}\text{C}$ NMR spectra of **1**, **2**, **3**, **1/3(50)**, and **2/3(50)**

The interactions of diol compound and protic salt were examined by  $^{13}\text{C}$  NMR. The carbonyl carbons of **1** and **2** appear at 167.2 ppm and 169.2 ppm, respectively. No shifts of the carbonyl carbon are observed for the mixtures **1/3(50)** and **2/3(50)**. These results suggest the carbonyl groups are not involved in specific interactions with protic salt **3**.

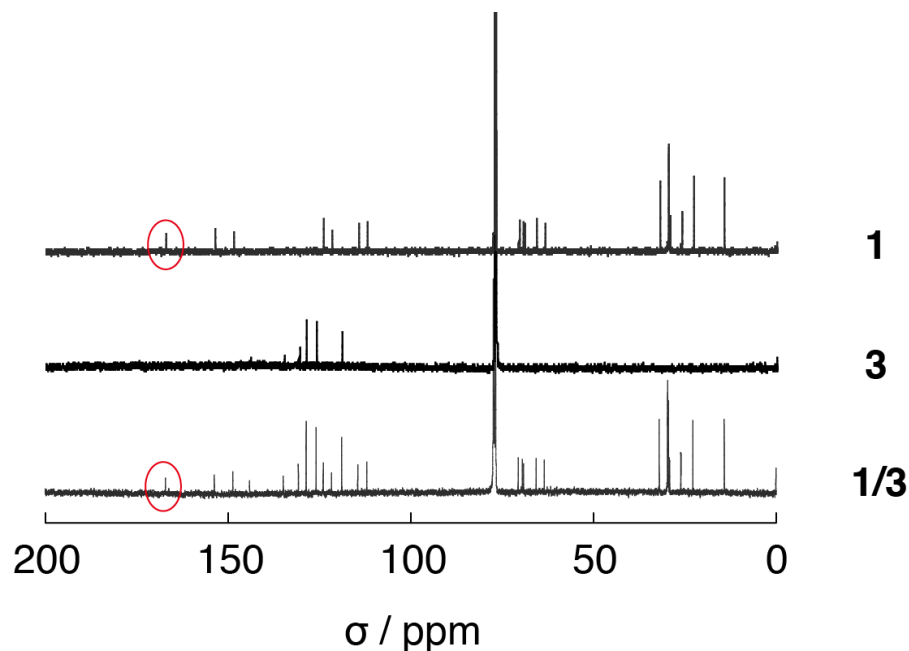

Figure S9.  $^{13}\text{C}$  NMR spectra of single compound **1** and **3** and equimolar mixture **1/3**.

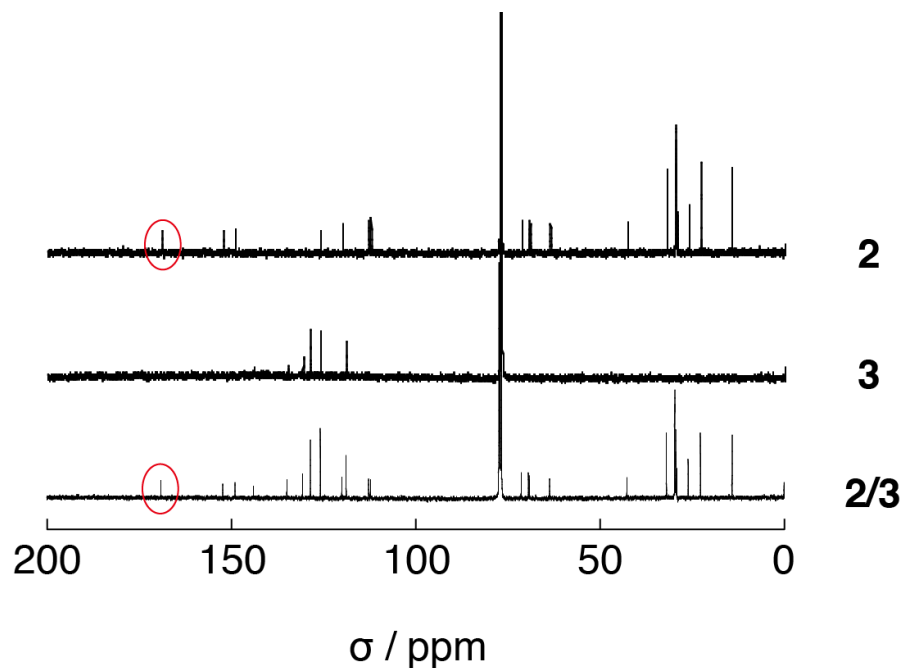

Figure S10.  $^{13}\text{C}$  NMR spectra of single compound **2** and **3** and equimolar mixture **2/3**.



## 6. IR spectra of single compounds 1-3 and the mixtures

The interactions of diol compounds **1**, **2** and protic salt **3** were examined by FT-IR measurements. The IR spectra of single compounds **1**, **2**, and **3** are shown in Figure S11-S13, respectively. Figures S14-S17 indicate the IR spectra of the mixtures of **1**, **2** with **3**. The IR spectra of the mixtures containing **3** at the different concentration were also recorded (Fig. S18).

vi

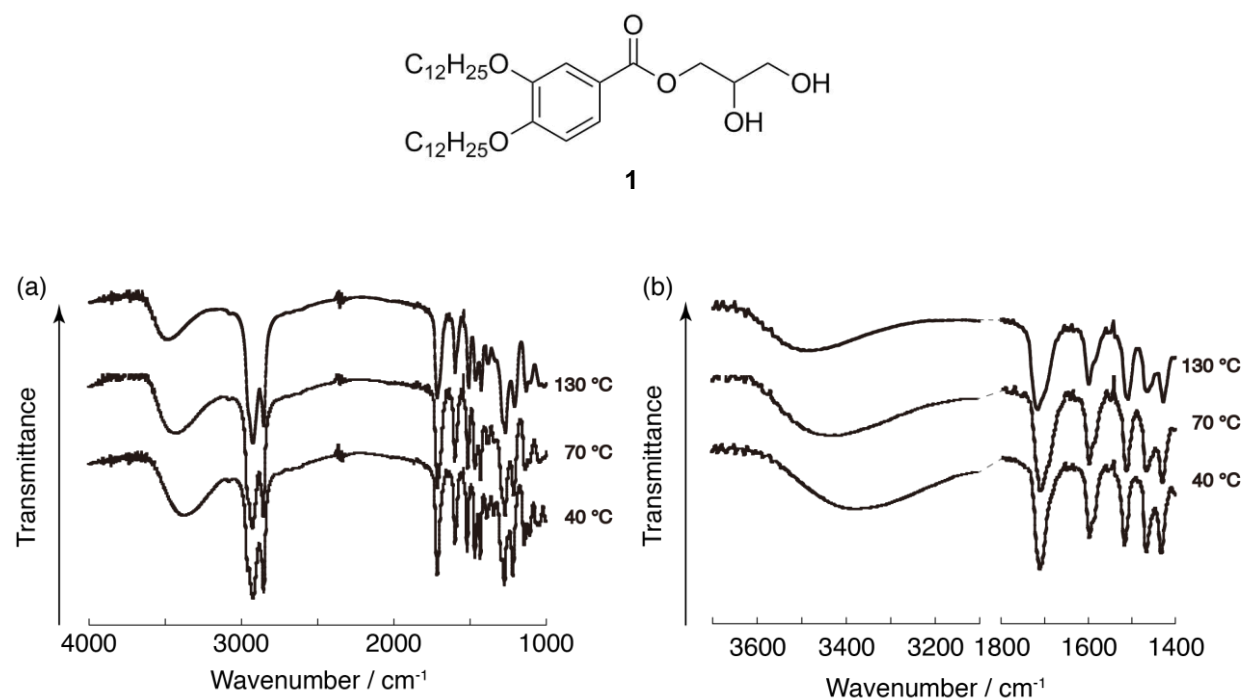

Figure S11. (a) Temperature dependent FT-IR spectra of compound **1** and (b) its enlarged view.

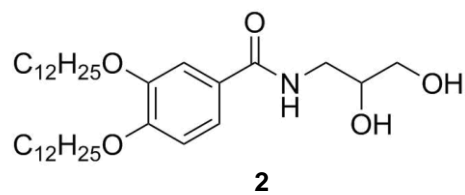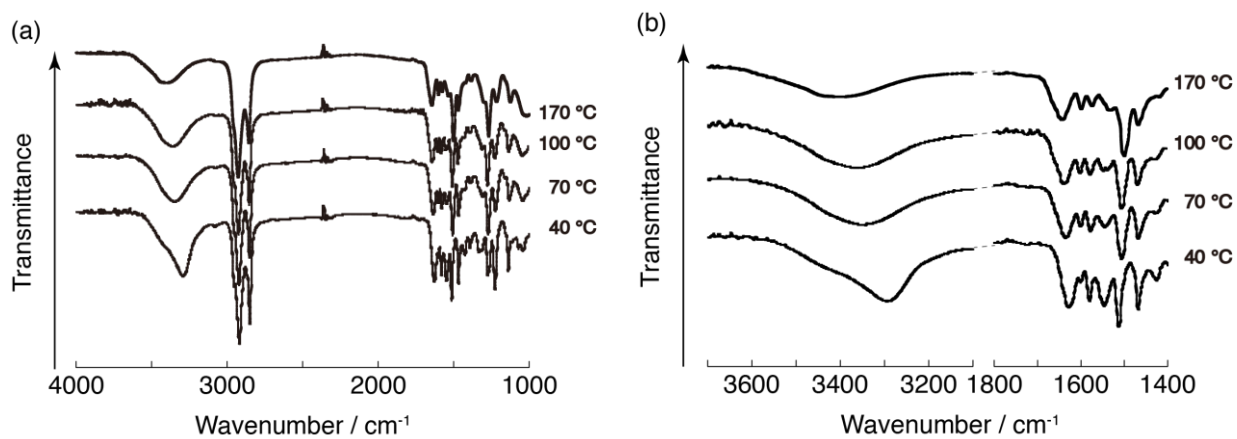

Figure S12. (a) Temperature dependent FT-IR spectra of compound **2** and (b) its enlarged view.

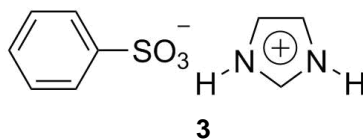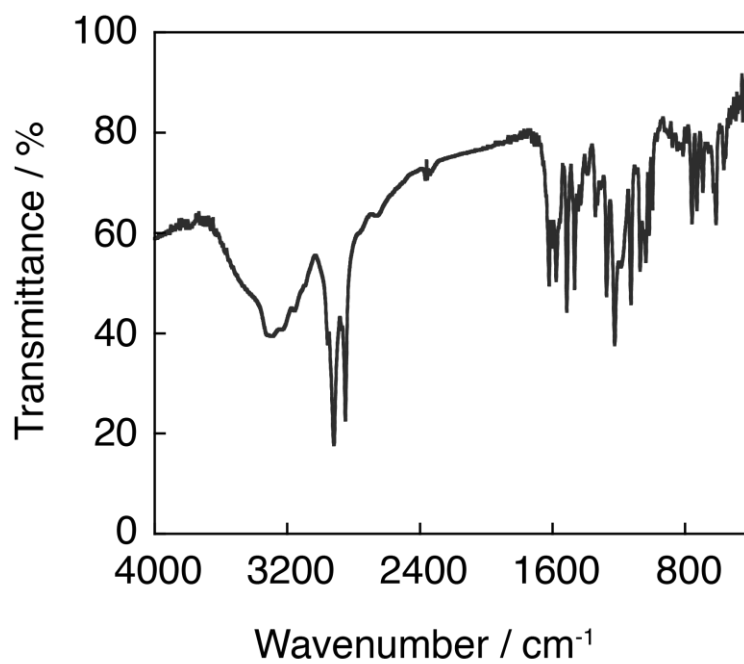

Figure S13. FT-IR spectra of protic salt **3** at room temperature.

For single compounds **1** and **2**, the O-H stretching band around  $3400\text{ cm}^{-1}$  is shifted to higher wavenumber as the temperature rises. The N-H and C=O bands are also slightly shifted to higher wavenumber.

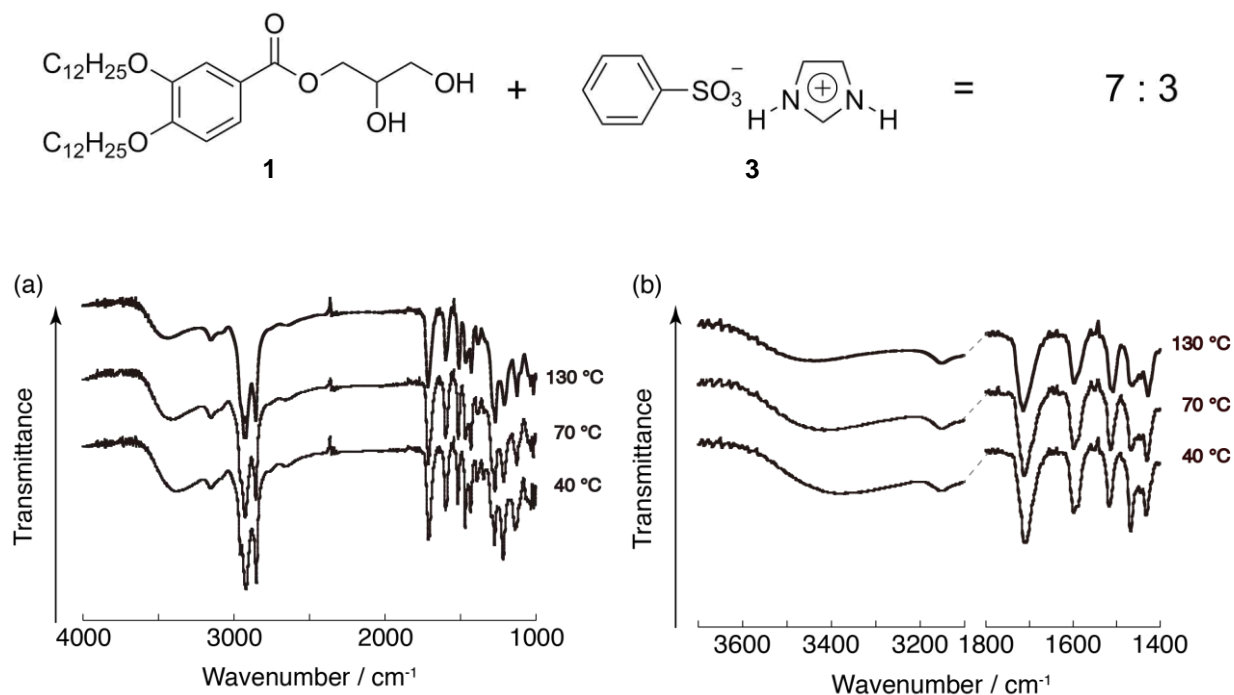

Figure S14. (a) Temperature dependent FT-IR spectra of the mixture **1/3(30)** and (b) its enlarged view.

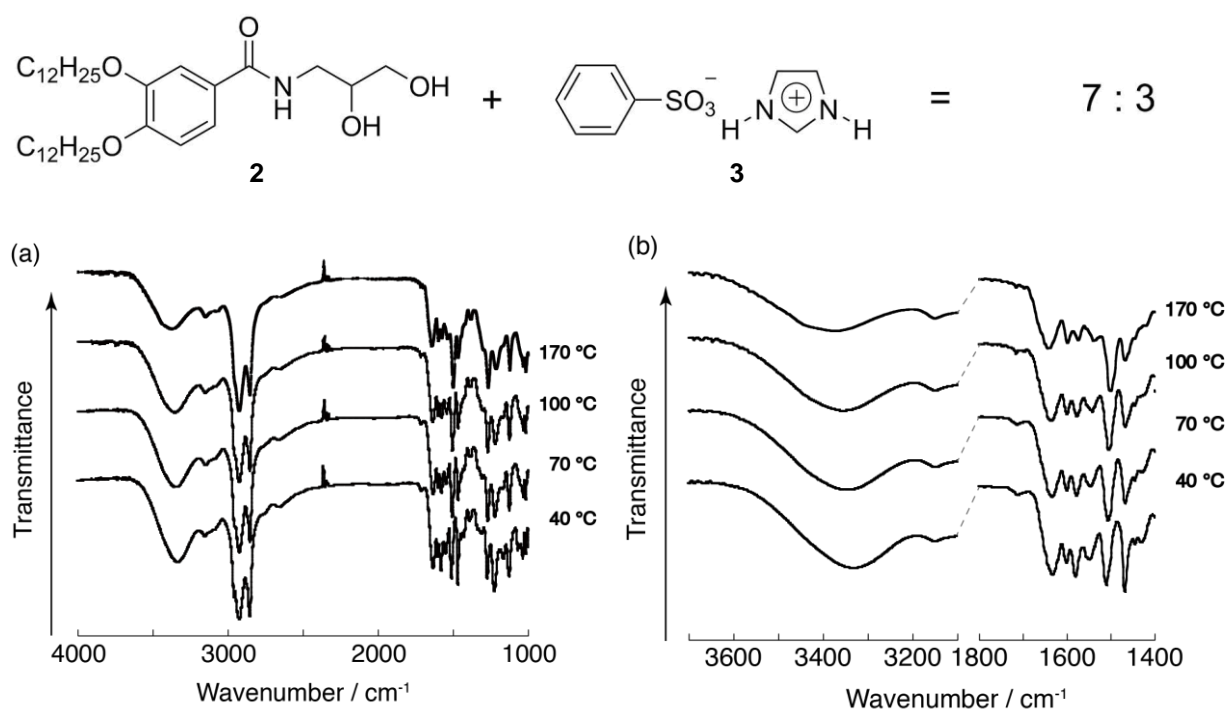

Figure S15. (a) Temperature dependent FT-IR spectra of the mixture **2/3(30)** and (b) its enlarged view.

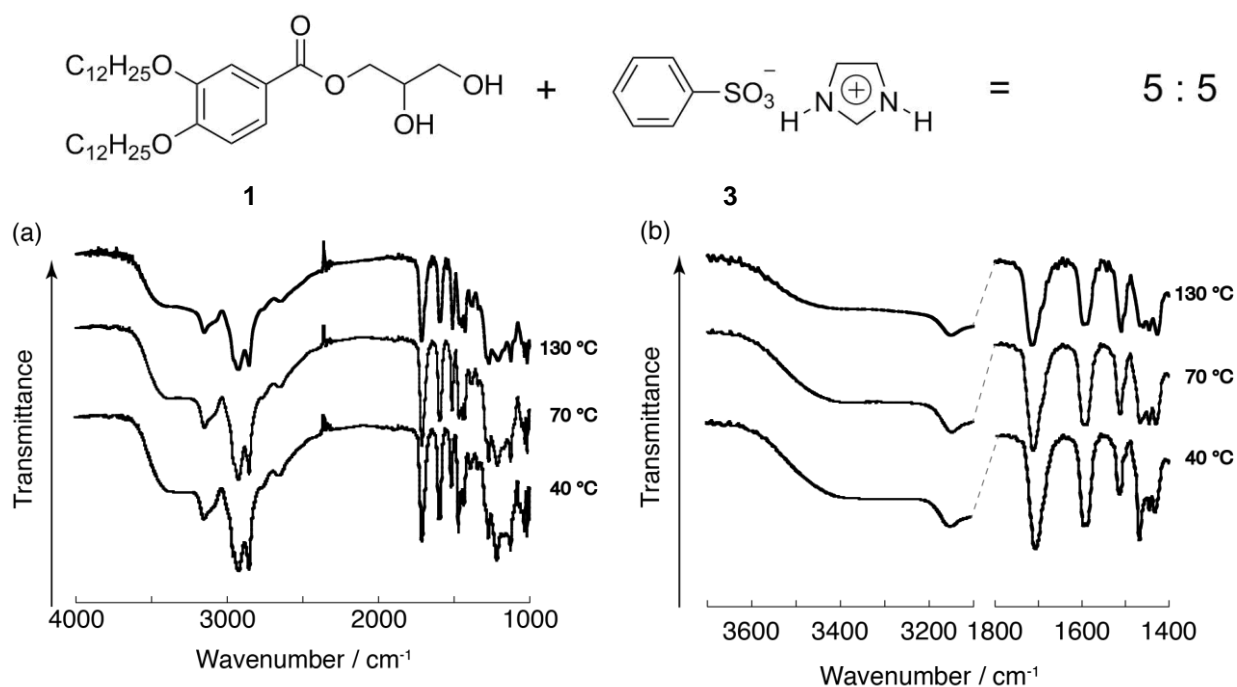

Figure S16. (a) Temperature dependent FT-IR spectra of the mixture **1/3**(50) and (b) its enlarged view.

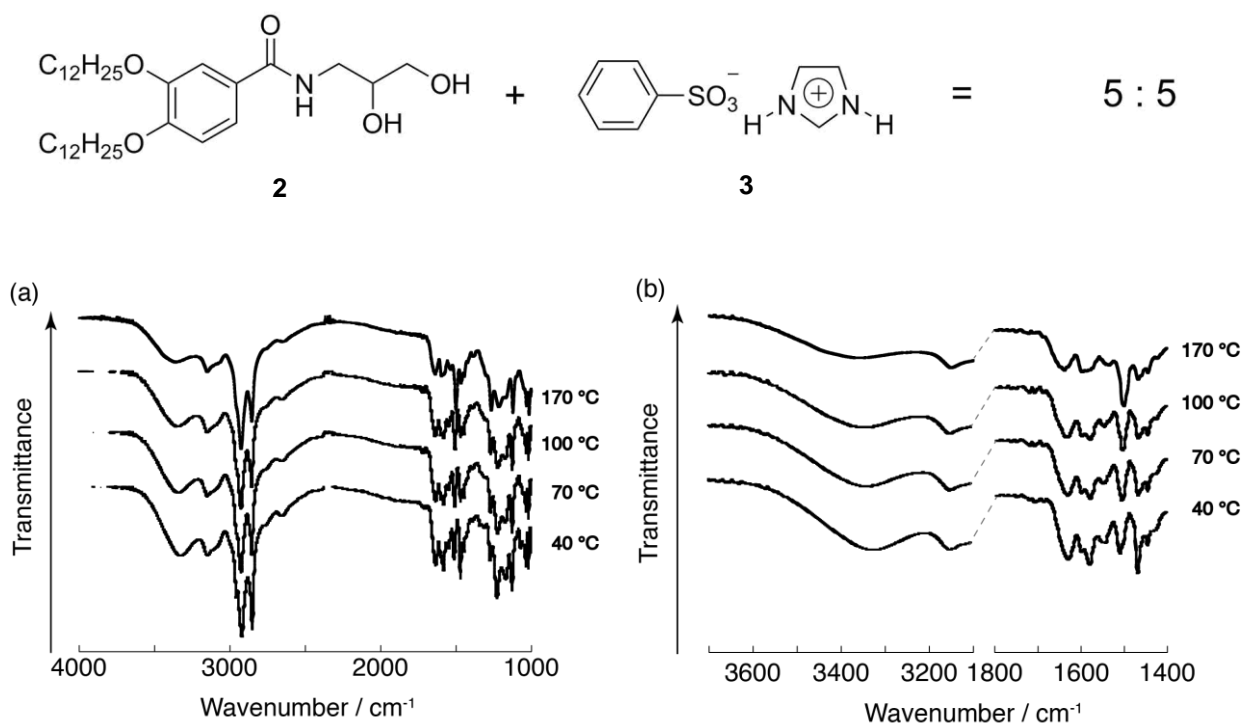

Figure S17. (a) Temperature dependent FT-IR spectra of the mixture **2/3**(50) and (b) its enlarged view.

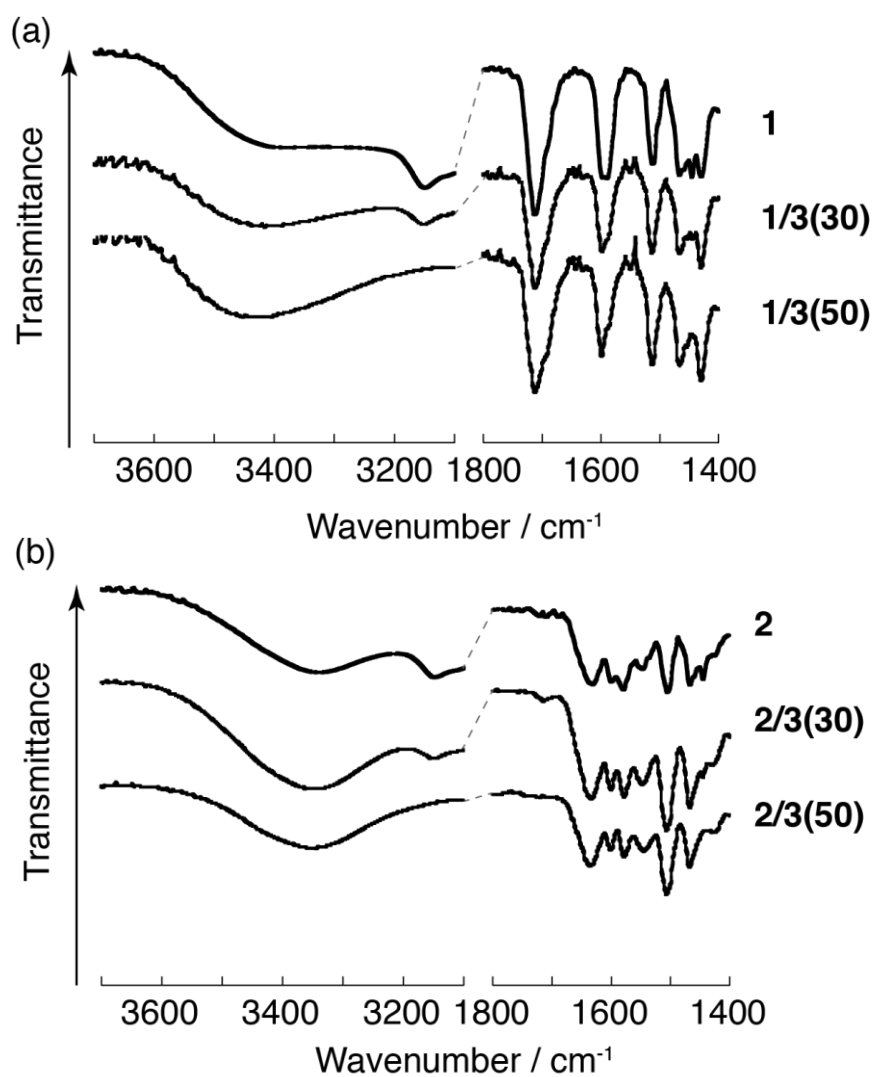

Figure S18. FT-IR spectra of (a) the mixtures of compound 1 and protic salt 3 and (b) the mixtures of compound 2 and protic salt 3 at 70 °C.

## 7. POM images of the uniaxially oriented 2/3(20) in the Col<sub>h</sub> phase

A uniaxially parallel orientation of the columns of the mixture 2/3(20) has been achieved between the comb-shaped gold electrodes on a glass substrate by the application of mechanical shear force to the sample at 120 °C.

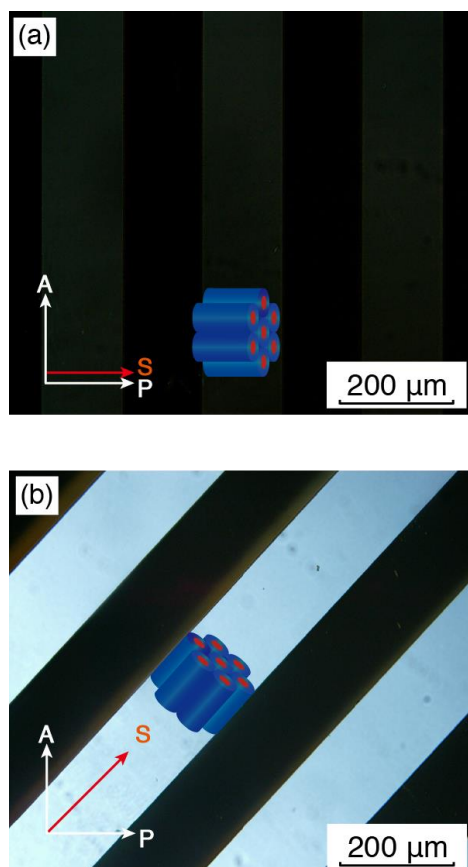

Figure S19. POM images of the uniaxially oriented mixture 2/3(20) under a crossed Nicols condition. (a) The shearing direction is parallel to the polarizer axis. (b) The sample of (a) is rotated by 45°. Arrows indicate the directions of the shear force (S), analyzer (A) and polarizer (P) axes.

## 8. Vogel-Tamman-Fulcher plots of the ionic conductivities for mixtures 1/3(x) and 2/3(x)

The temperature dependence of the ionic conductivities for the mixtures 1/3(x) and 2/3(x), where x denotes the mole% of 3, are fitted by the Vogel-Tamman-Fulcher (VTF) equation:

$$\sigma = \frac{A}{\sqrt{T}} \exp\left(\frac{-B}{T - T_0}\right)$$

where  $\sigma$  and T are the ionic conductivity and the absolute temperature. A, B and  $T_0$  are fitting parameters. The parameter A ( $\text{S m}^{-1} \text{K}^{1/2}$ ) is related to the carrier ion number. The parameter B (K) is related to the activation energy. The product of B (K) and the molar gas constant ( $8.31 \text{ J K}^{-1} \text{ mol}^{-1}$ ) has the dimension of activation energy ( $\text{J mol}^{-1}$ ).  $T_0$  (K) is the ideal glass transition temperature at which the configurational entropy vanishes.

The temperature dependencies of ionic conductivities for the mixtures 1/3(x) and 2/3(x) are well fitted by the VTF equation. The VTF fitting parameters are summarized in Table S1. For example, the VTF fitting of the ionic conductivities for the mixture 2/3(20) in the  $\text{Col}_h$  phase is shown in Figure S20. The VTF plots of the ionic conductivities for the mixtures 1/3(x) and 2/3(x) shown in Figure S21 are depicted as straight lines.

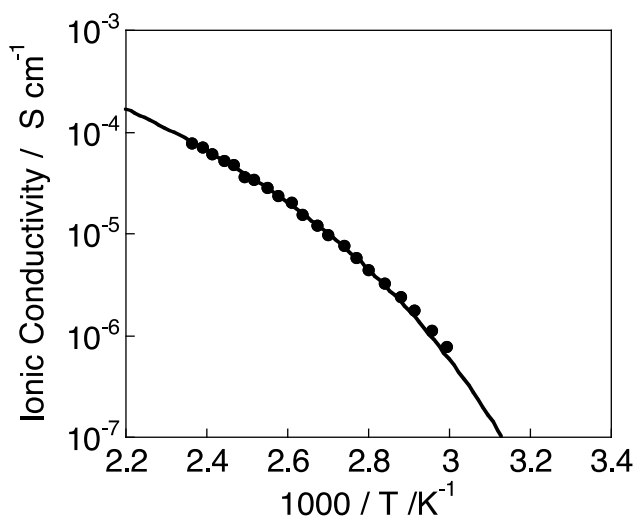

Figure S20. Arrhenius plots for the ionic conductivity of the mixture 2/3(20). The solid line is the fitting result of the value of ionic conductivity on the VTF equation.

Table S1. VTF fitting parameters of the ionic conductivities for mixtures **1/3(x)** and **2/3(x)**.

|                | $A$ ( $\text{S m}^{-1} \text{K}^{1/2}$ ) | $B$ (K) | $T_0$ (K) | $R^2$  |
|----------------|------------------------------------------|---------|-----------|--------|
| <b>1/3(20)</b> | 0.032                                    | 625.9   | 238.8     | 0.9983 |
| <b>1/3(30)</b> | 0.121                                    | 751.3   | 229.7     | 0.9991 |
| <b>1/3(50)</b> | 13.10                                    | 2161.1  | 124.82    | 0.9972 |
| <b>2/3(20)</b> | 0.049                                    | 877.71  | 242.34    | 0.9984 |
| <b>2/3(30)</b> | 0.173                                    | 847.73  | 239.43    | 0.9996 |
| <b>2/3(50)</b> | 14.35                                    | 2480.1  | 128.02    | 0.9986 |

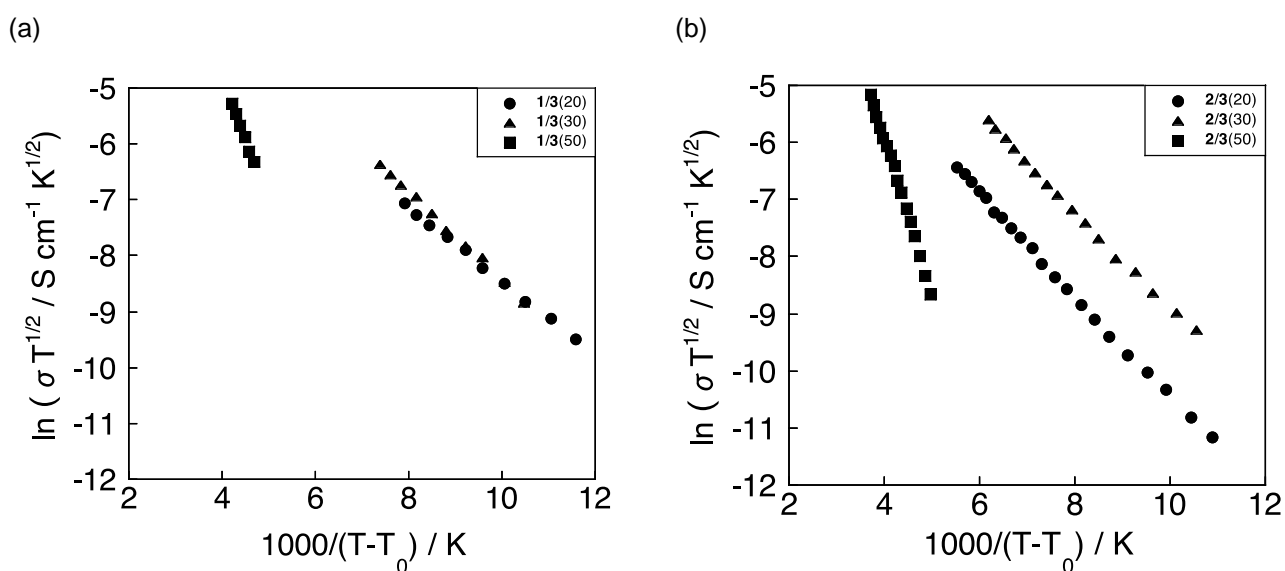

Figure S21. VTF plots of the ionic conductivities for (a) the mixture **1/3(x)** and (b) the mixture **2/3(x)** in the liquid-crystalline phases. The mixtures **1/3(20)**, **1/3(30)**, **2/3(20)**, and **2/3(30)** form the  $\text{Col}_h$  phases. The mixtures **1/3(50)** and **2/3(50)** exhibit the  $\text{S}_A$  phases.



## 9. DSC thermograms of 1, 2 and their mixtures with 3

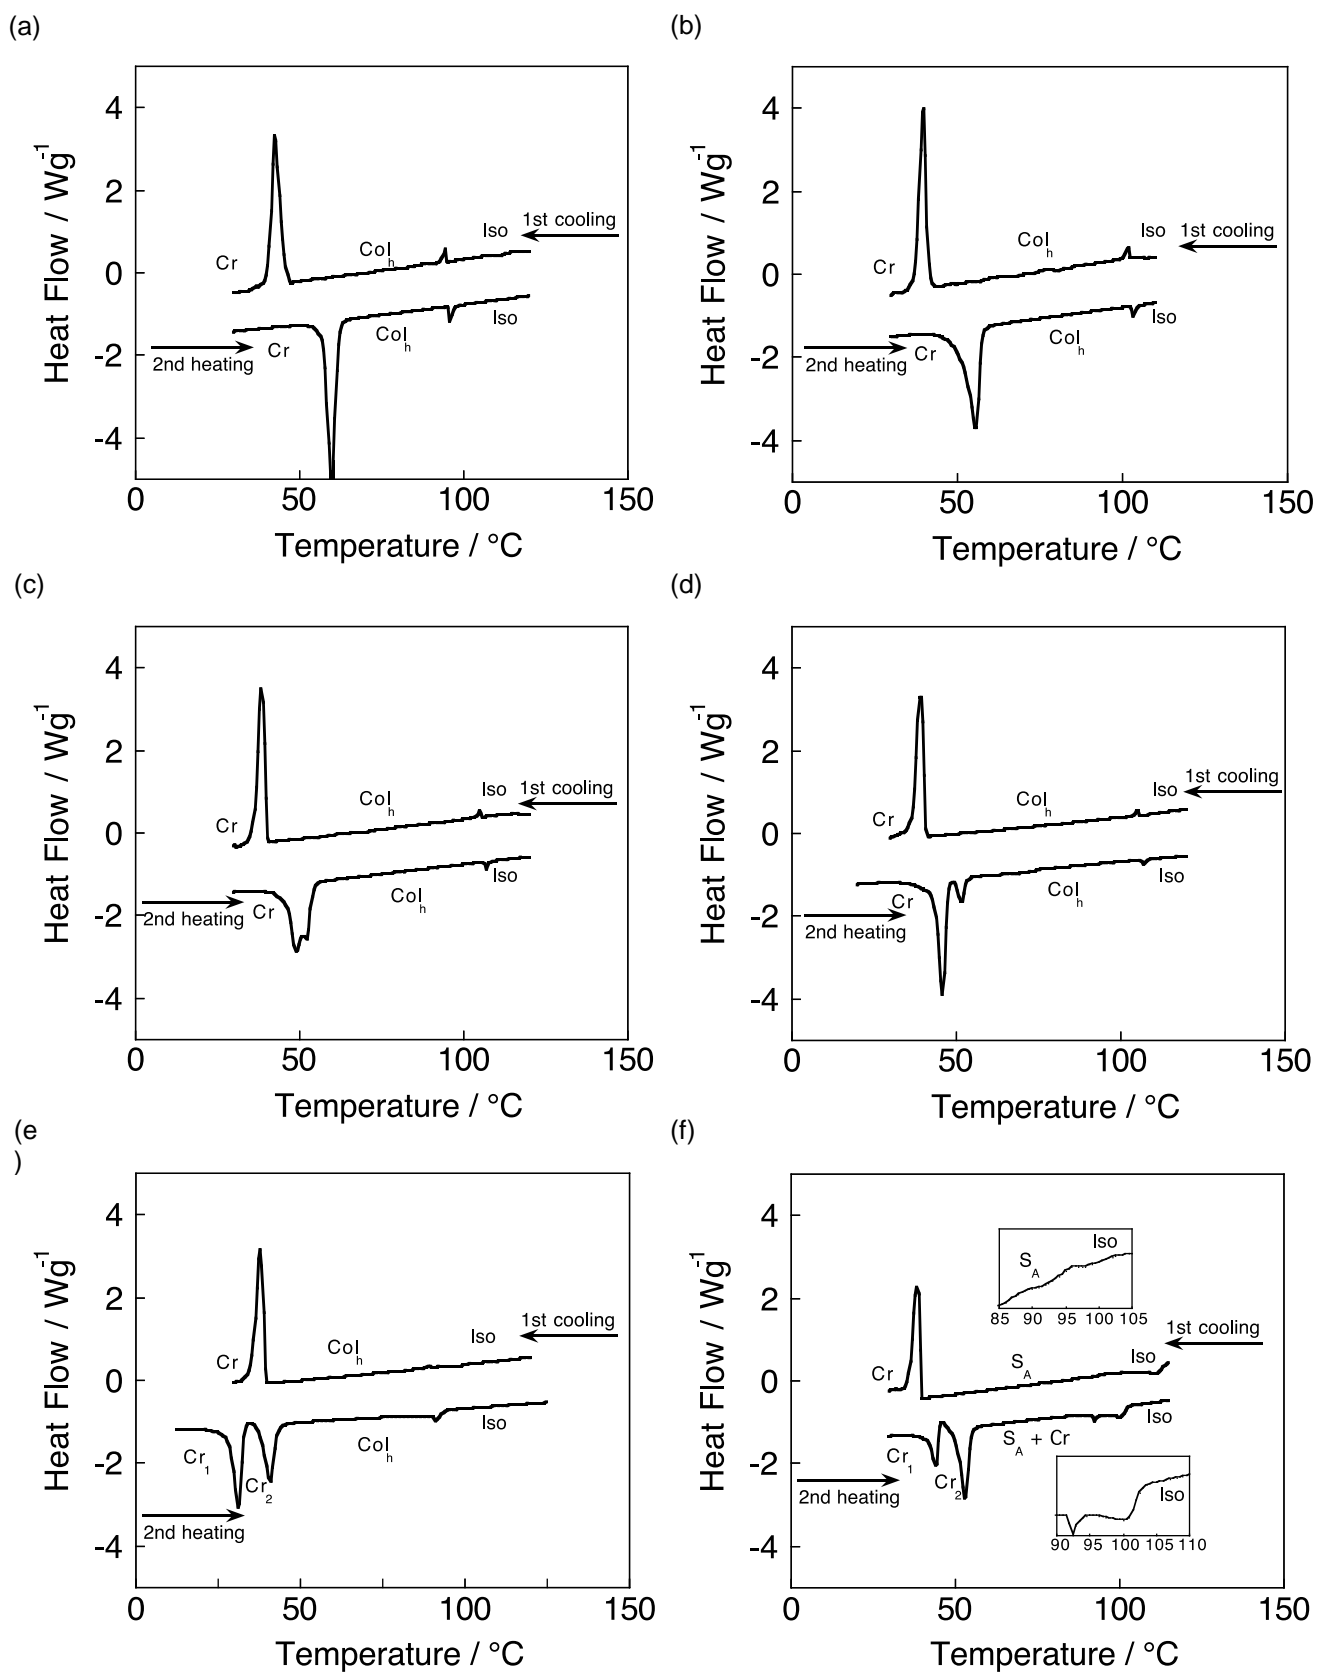

Figure S22. DSC thermograms of (a) compound 1, (b) mixture 1/3(10), (c) mixture 1/3(20), (d) mixture 1/3(30), (e) mixture 1/3(40), and (f) mixture 1/3(50) at the scanning rate of 10 K/min.

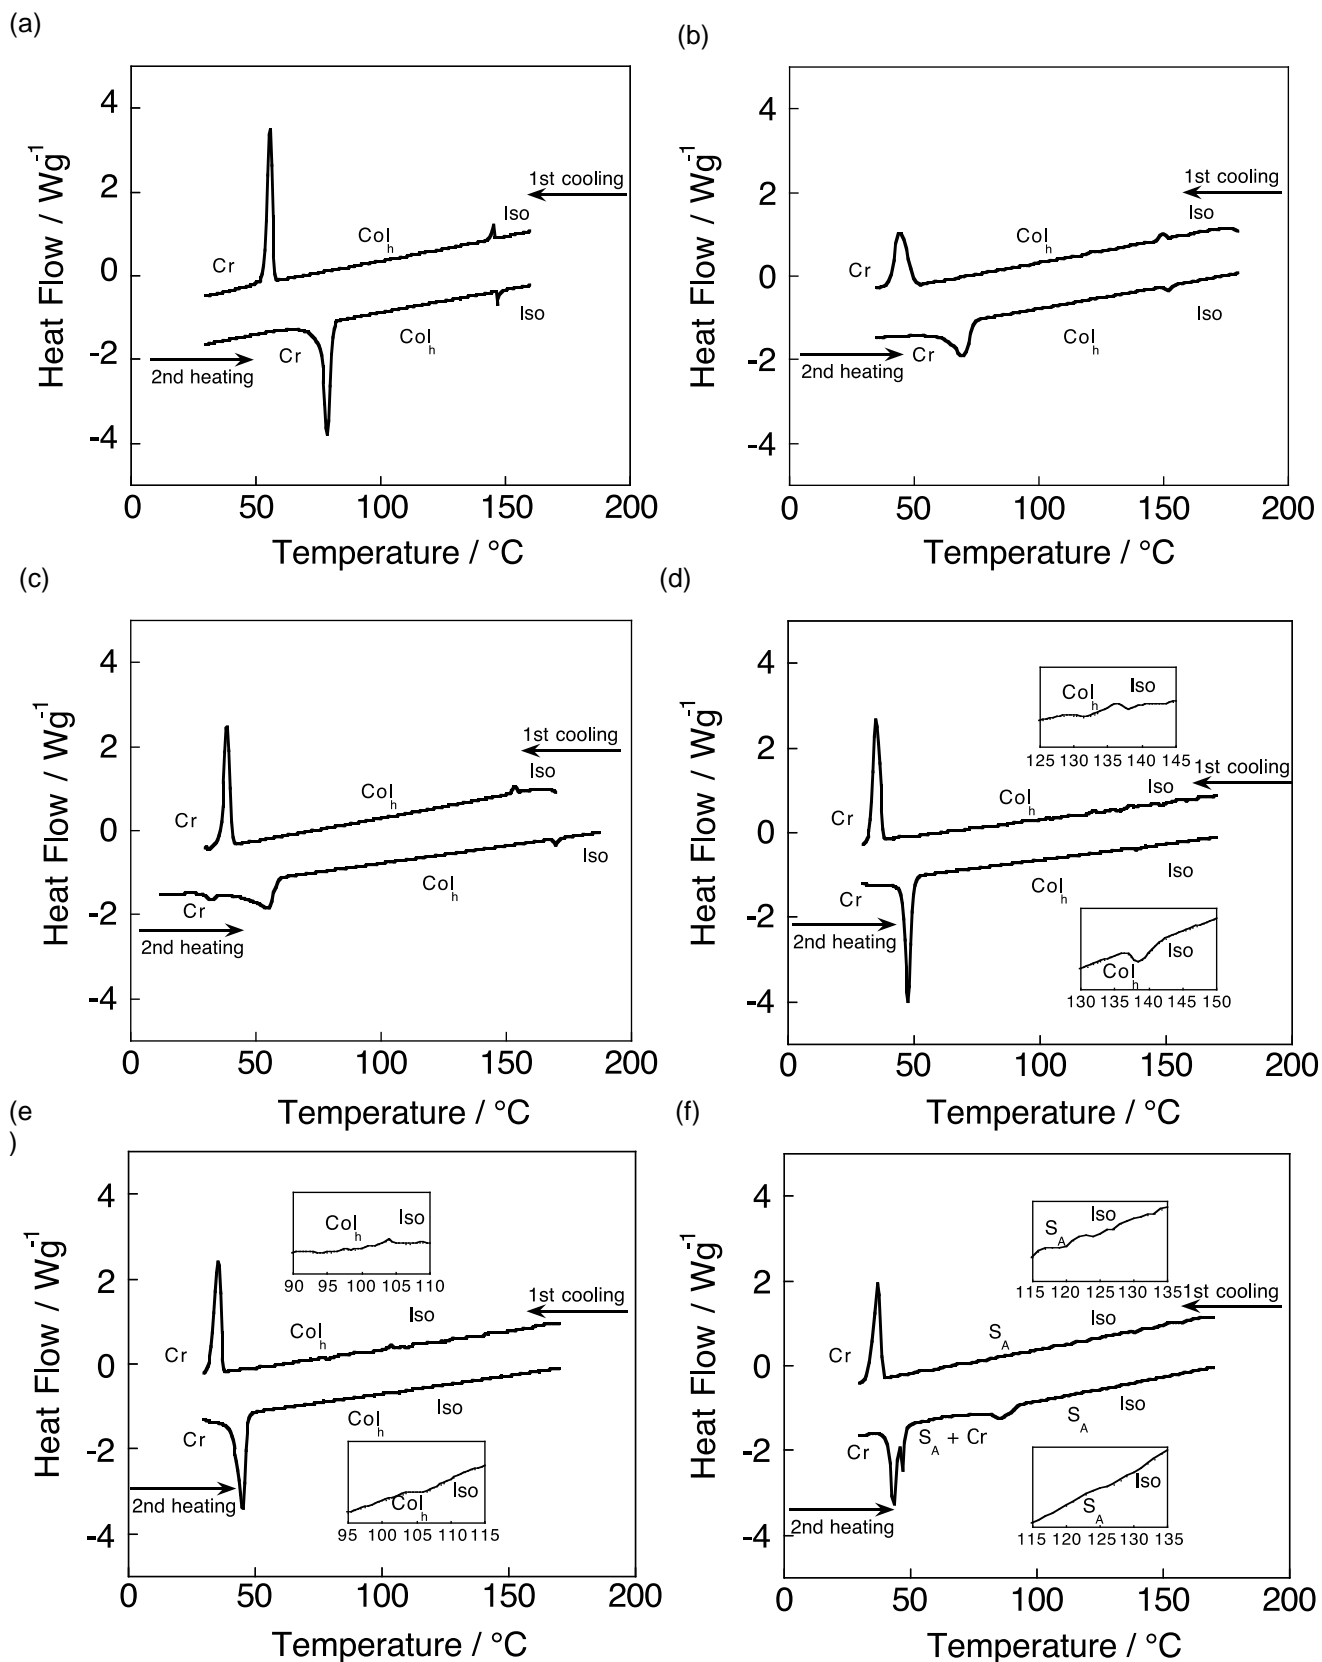

Figure S23. DSC thermograms of (a) compound **2**, (b) mixture **2/3(10)**, (c) mixture **2/3(20)**, (d) mixture **2/3(30)**, (e) mixture **2/3(40)**, and (f) mixture **2/3(50)** at the scanning rate of 10 K/min.

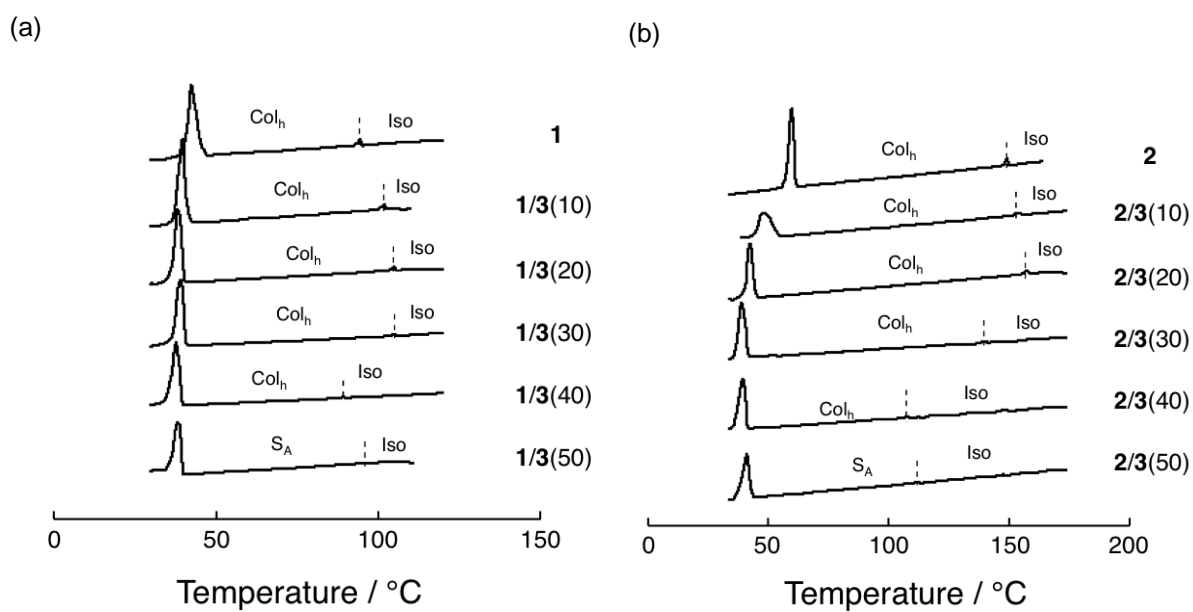

Figure S24. DSC thermograms of (a) the mixtures **1/3(x)** and (b) the mixtures **2/3(x)** on cooling at the scanning rate of 10 K/min.

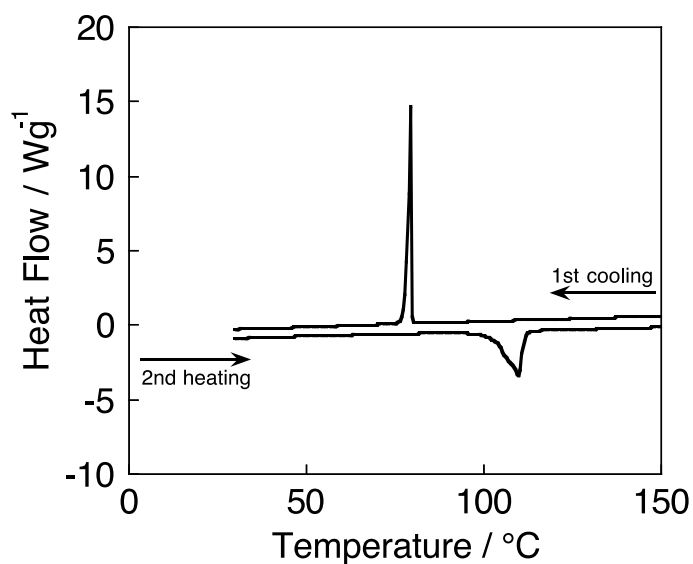

Figure S25. DSC thermograms of protic salt **3** at the scanning rate of 10 K/min.

## 10. Wide-angle XRD diffraction patterns of the mixtures

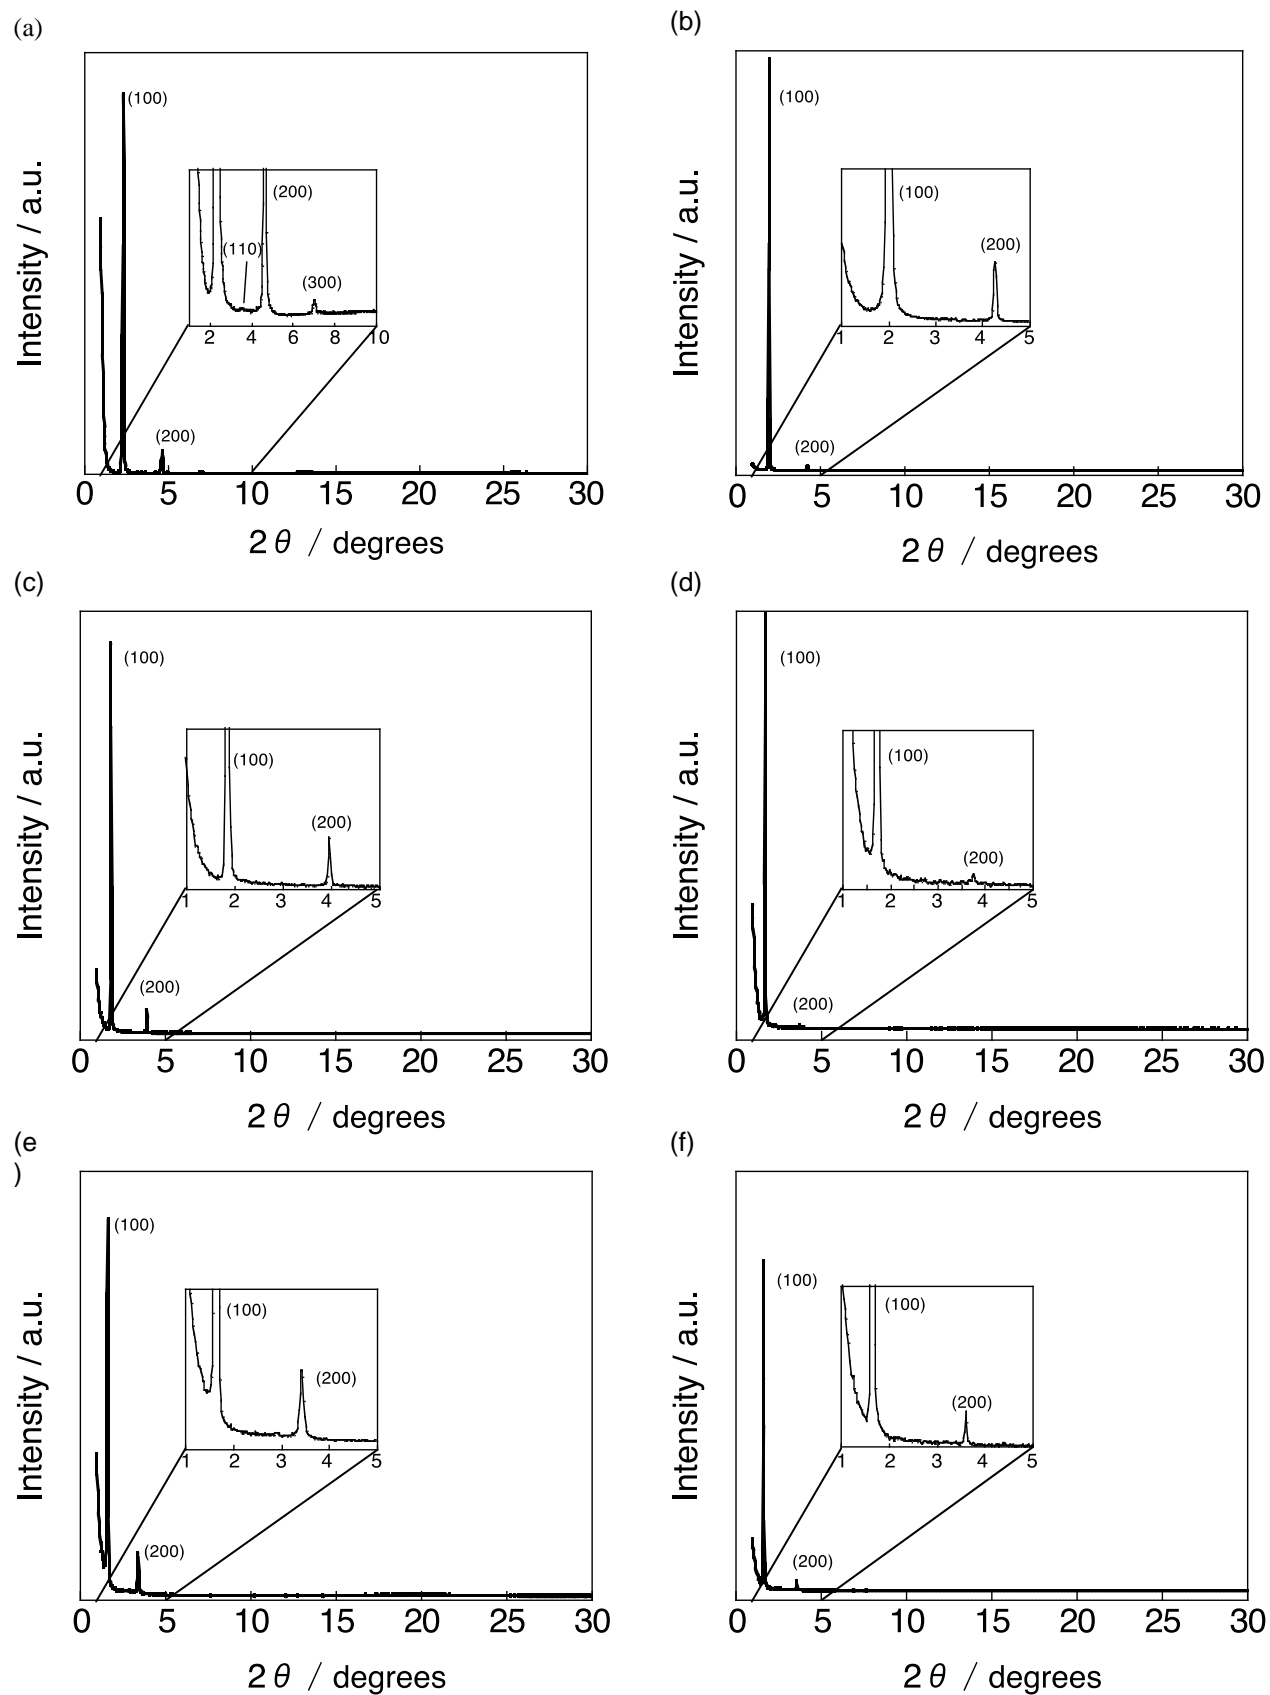

Figure S26. Wide-angle XRD patterns of (a) compound 1, (b) mixture 1/3(10), (c) mixture 1/3(20), (d) mixture 1/3(30), (e) mixture 1/3(40), and (f) mixture 1/3(50) at 70 °C.

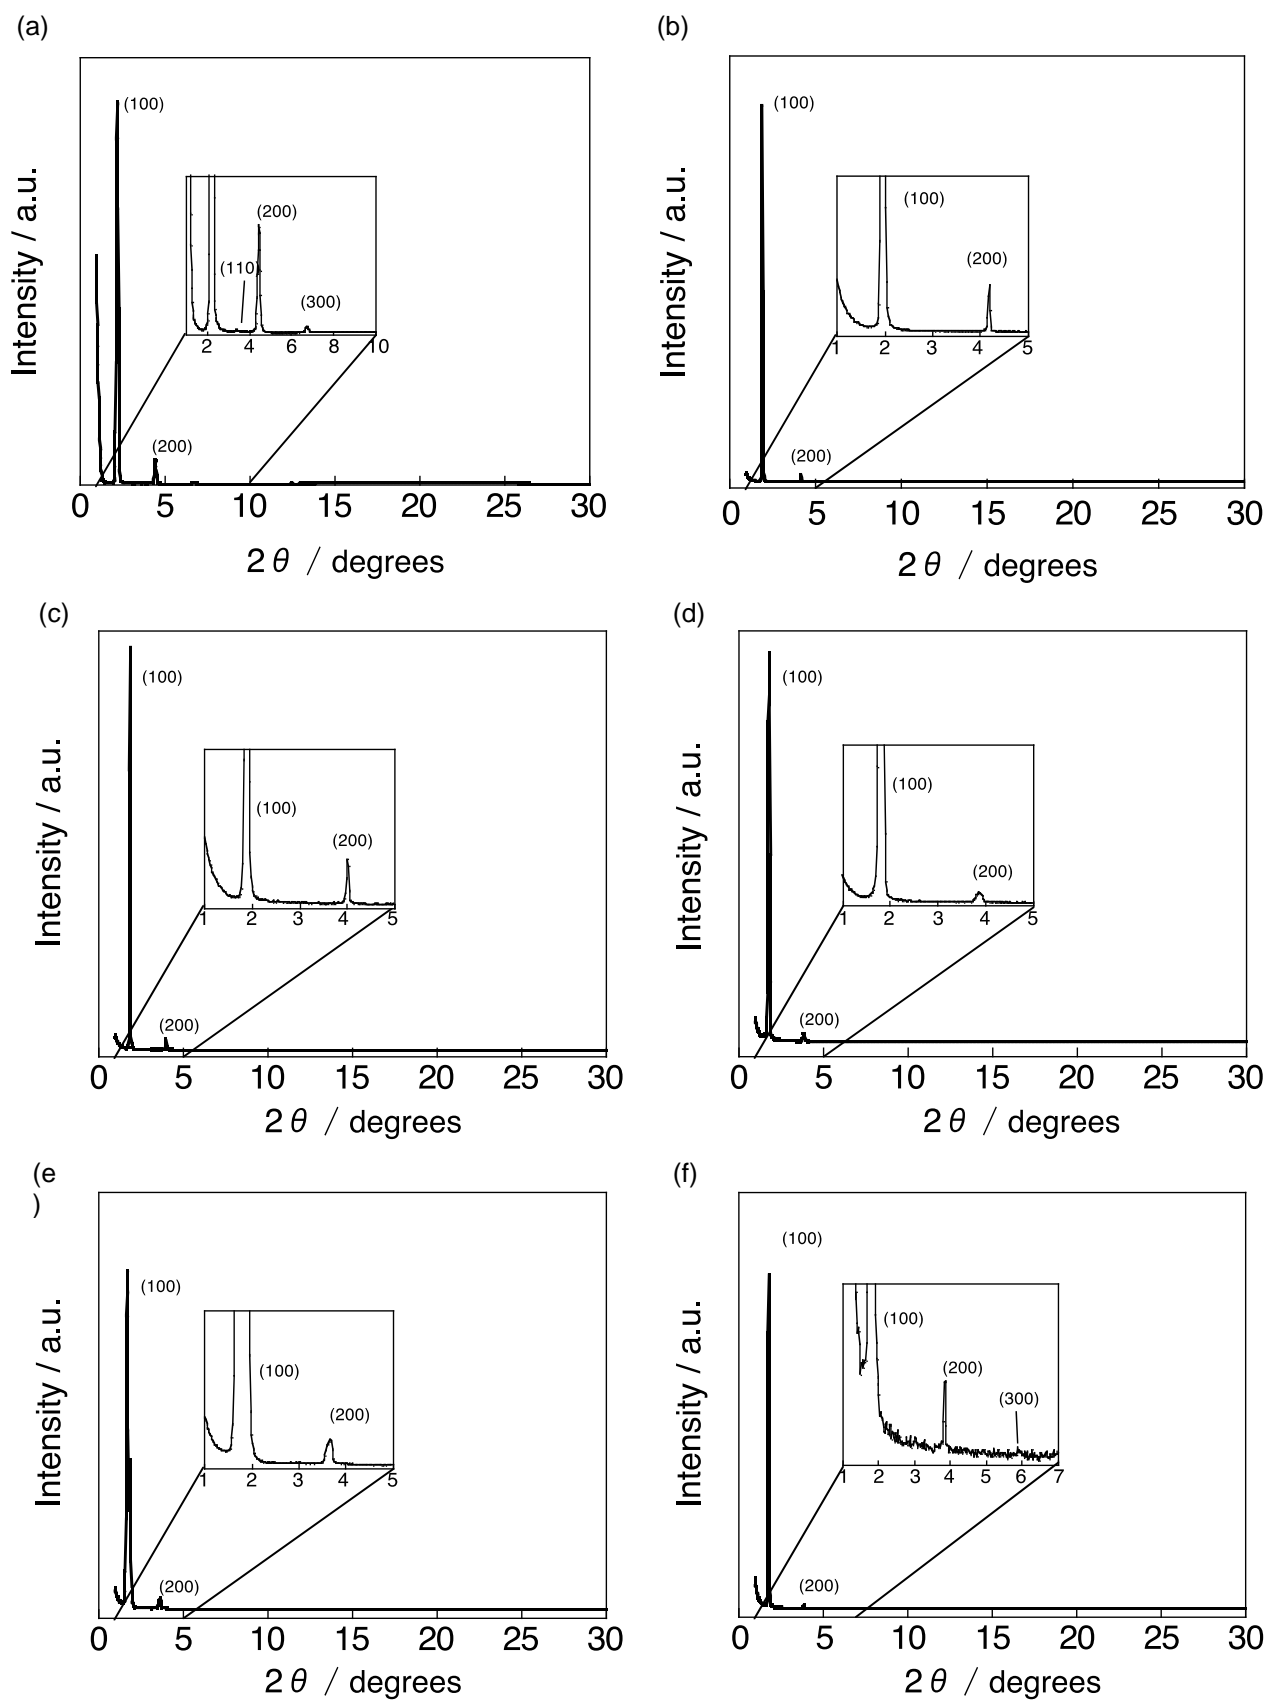

Figure S27. Wide-angle XRD patterns of (a) compound **2**, (b) mixture **2/3(10)**, (c) mixture **2/3(20)**, (d) mixture **2/3(30)**, (e) mixture **2/3(40)**, and (f) mixture **2/3(50)** at 70 °C.

Table S2. The values of  $d$ -spacing for the mixtures  $1/3(x)$  at 70 °C.

|                | (100) [Å] | (200) [Å] |
|----------------|-----------|-----------|
| <b>1</b>       | 39.41     | 19.71     |
| <b>1/3(10)</b> | 45.04     | 21.02     |
| <b>1/3(20)</b> | 46.95     | 21.96     |
| <b>1/3(30)</b> | 47.97     | 22.87     |
| <b>1/3(40)</b> | 50.73     | 23.99     |
| <b>1/3(50)</b> | 49.04     | 22.75     |

Table S3. The values of  $d$ -spacing for the mixtures  $2/3(x)$  at 70 °C.

|                | (100) [Å] | (200) [Å] |
|----------------|-----------|-----------|
| <b>2</b>       | 37.72     | 18.87     |
| <b>2/3(10)</b> | 44.14     | 20.63     |
| <b>2/3(20)</b> | 47.97     | 22.29     |
| <b>2/3(30)</b> | 50.73     | 23.36     |
| <b>2/3(40)</b> | 55.17     | 25.66     |
| <b>2/3(50)</b> | 49.04     | 22.87     |

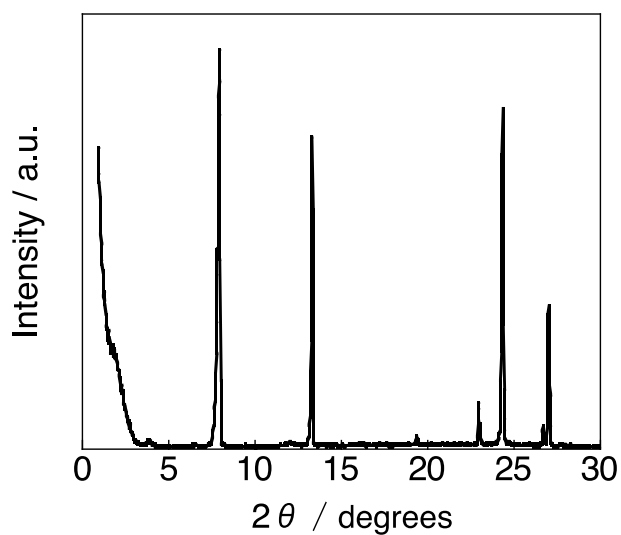

Figure S28. Wide-angle XRD pattern of protic salt **3** at 25 °C.
